# Supplementary material
Source: PubMed Central journal article supplement (PMC6238580)
Supplement: LSA-2018-00059_TableS1.pdf [file LSA-2018-00059_TableS1.pdf]

**Table S1. Effect of the  $\beta$ -tubulin C-terminal tail on microtubule assembly.**

| Parameter<br>(mean $\pm$ SEM)                | Untreated                                              |                                                                |                                                                                         | Paclitaxel 6 nM                                        |                                                               |                                                                                         | Paclitaxel 20 nM                                       |                                                               |                                                                                        |
|----------------------------------------------|--------------------------------------------------------|----------------------------------------------------------------|-----------------------------------------------------------------------------------------|--------------------------------------------------------|---------------------------------------------------------------|-----------------------------------------------------------------------------------------|--------------------------------------------------------|---------------------------------------------------------------|----------------------------------------------------------------------------------------|
|                                              | Full-length $\beta$ III-Tubulin (ZB3)<br>(n=150 cells) | Truncated $\beta$ III-Tubulin (ZB3 $\Delta$ )<br>(n=133 cells) | $\beta$ III-tubulin Body + $\beta$ I-tubulin C-terminal Tail (ZB3/CB1)<br>(n=106 cells) | Full-length $\beta$ III-Tubulin (ZB3)<br>(n=125 cells) | Truncated $\beta$ III-Tubulin (ZB3 $\Delta$ )<br>(n=89 cells) | $\beta$ III-Tubulin Body + $\beta$ I-Tubulin C-terminal Tail (ZB3/CB1)<br>(n=100 cells) | Full-length $\beta$ III-Tubulin (ZB3)<br>(n=113 cells) | Truncated $\beta$ III-Tubulin (ZB3 $\Delta$ )<br>(n=99 cells) | $\beta$ III-Tubulin Body + $\beta$ I-Tubulin C-terminal Tail (ZB3/CB1)<br>(n=96 cells) |
| Assembly Rate ( $\mu$ m/min)                 | 26.162 $\pm$ 0.061                                     | 26.355 $\pm$ 0.059                                             | <b>24.667 <math>\pm</math> 0.061</b>                                                    | 19.516 $\pm$ 0.060*                                    | <b>21.969 <math>\pm</math> 0.093*</b>                         | <b>23.622 <math>\pm</math> 0.085*</b>                                                   | 23.311 $\pm$ 0.150*                                    | <b>24.557 <math>\pm</math> 0.168*</b>                         | <b>25.727<math>\pm</math>0.210*</b>                                                    |
| Growth Length ( $\mu$ m)                     | 1.594 $\pm$ 0.032                                      | 1.593 $\pm$ 0.023                                              | <b>1.416 <math>\pm</math> 0.019</b>                                                     | 1.328 $\pm$ 0.018*                                     | <b>1.306 <math>\pm</math> 0.033*</b>                          | <b>1.210 <math>\pm</math> 0.016*</b>                                                    | 1.177 $\pm$ 0.014*                                     | 1.130 $\pm$ 0.021*                                            | <b>0.988<math>\pm</math>0.020*</b>                                                     |
| Growth Duration (s)                          | 1.357 $\pm$ 0.036                                      | 1.284 $\pm$ 0.018                                              | <b>1.153 <math>\pm</math> 0.018</b>                                                     | 1.701 $\pm$ 0.035*                                     | <b>1.572 <math>\pm</math> 0.041*</b>                          | <b>1.419 <math>\pm</math> 0.029*</b>                                                    | 1.687 $\pm$ 0.045*                                     | <b>1.518 <math>\pm</math> 0.056*</b>                          | <b>1.496<math>\pm</math>0.051*</b>                                                     |
| Number of microtubule growth events per cell | 333.7 $\pm$ 11.64                                      | 320.5 $\pm$ 10.24                                              | <b>292.9 <math>\pm</math> 10.01</b>                                                     | 328.7 $\pm$ 9.15                                       | <b>298 <math>\pm</math> 13.87</b>                             | <b>254.7 <math>\pm</math> 10.61*</b>                                                    | 160.1 $\pm$ 12.3*                                      | <b>151.5 <math>\pm</math> 16.05*</b>                          | <b>125.5<math>\pm</math>10.19*</b>                                                     |

Mean  $\pm$  SEM

**Bold: p<0.05 compared with cells expressing the full-length  $\beta$ III-tubulin protein (ZB3)**

\* p<0.05 compared with untreated cells
